# Supplementary material
Source: PubMed Central journal article supplement (PMC5672043)
Supplement: 10.1074_M117.813923_jbc.M117.813923-1.pdf [file 10.1074_M117.813923_jbc.M117.813923-1.pdf]

**SUPPLEMENTAL MATERIAL**

**The NQO1 bioactivatable drug, β-Lapachone, alters the redox state of NQO1+ pancreatic cancer cells causing perturbation in central carbon metabolism**

Molly A. Silvers\*, Stanislaw Deja\*, Naveen Singh, Robert A. Egnatchik, Jessica Sudderth, Xiuquan Luo, Muhammad S. Beg, Shawn C. Burgess, Ralph J. DeBerardinis, David A. Boothman, and Matthew E. Merritt

\*These authors contributed equally

**Table of Contents:**

|                 |     |
|-----------------|-----|
| Figure S1 ..... | S-2 |
| Figure S2.....  | S-3 |
| Figure S3.....  | S-4 |
| Figure S4.....  | S-5 |
| Figure S5.....  | S-6 |
| Figure S6.....  | S-7 |

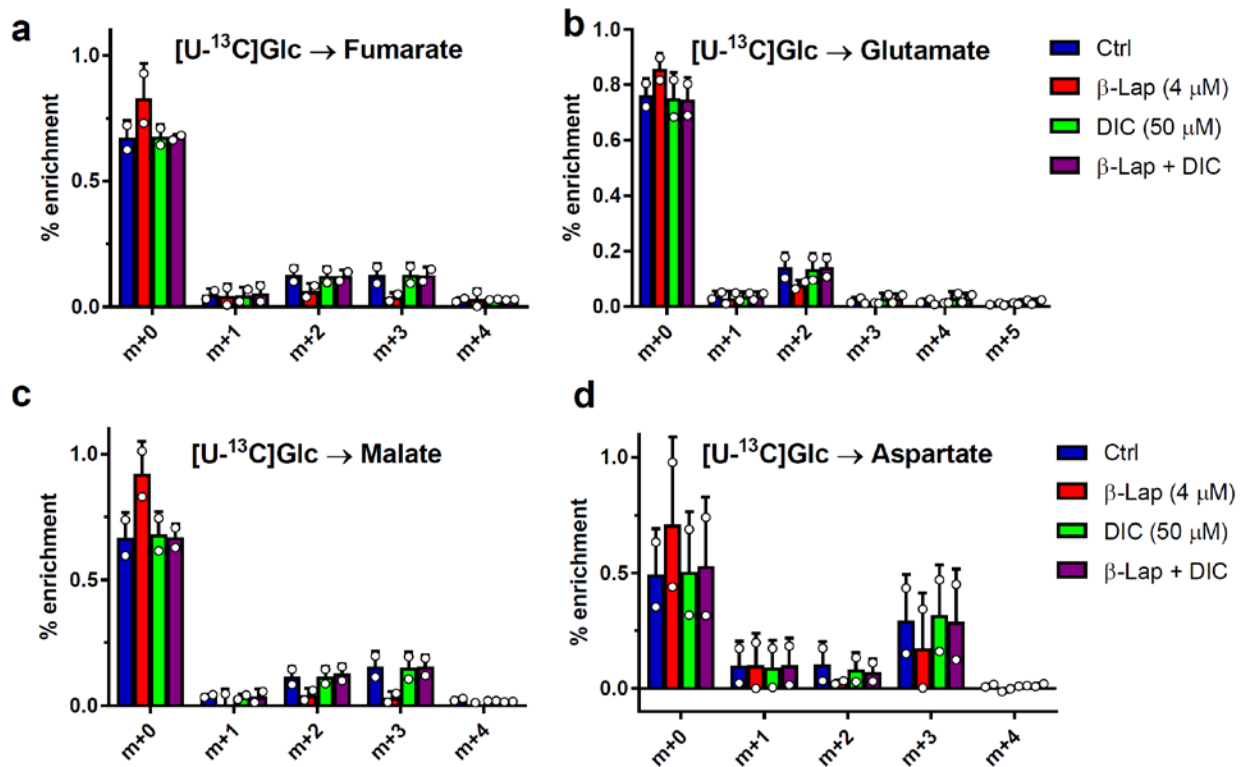

**Figure S1. Labeling of TCA cycle intermediates.** (a-d) Plates were incubated with 10 mM U-<sup>13</sup>C Glucose after a 2 h β-lap (4 μM) treatment, with or without dicoumarol (DIC, 50 μM). Graph shows labeling pattern of isotopomers after a 2 h U-<sup>13</sup>C Glucose incubation for: (a) fumarate, (b) glutamate, (c) malate, and (d) aspartate.

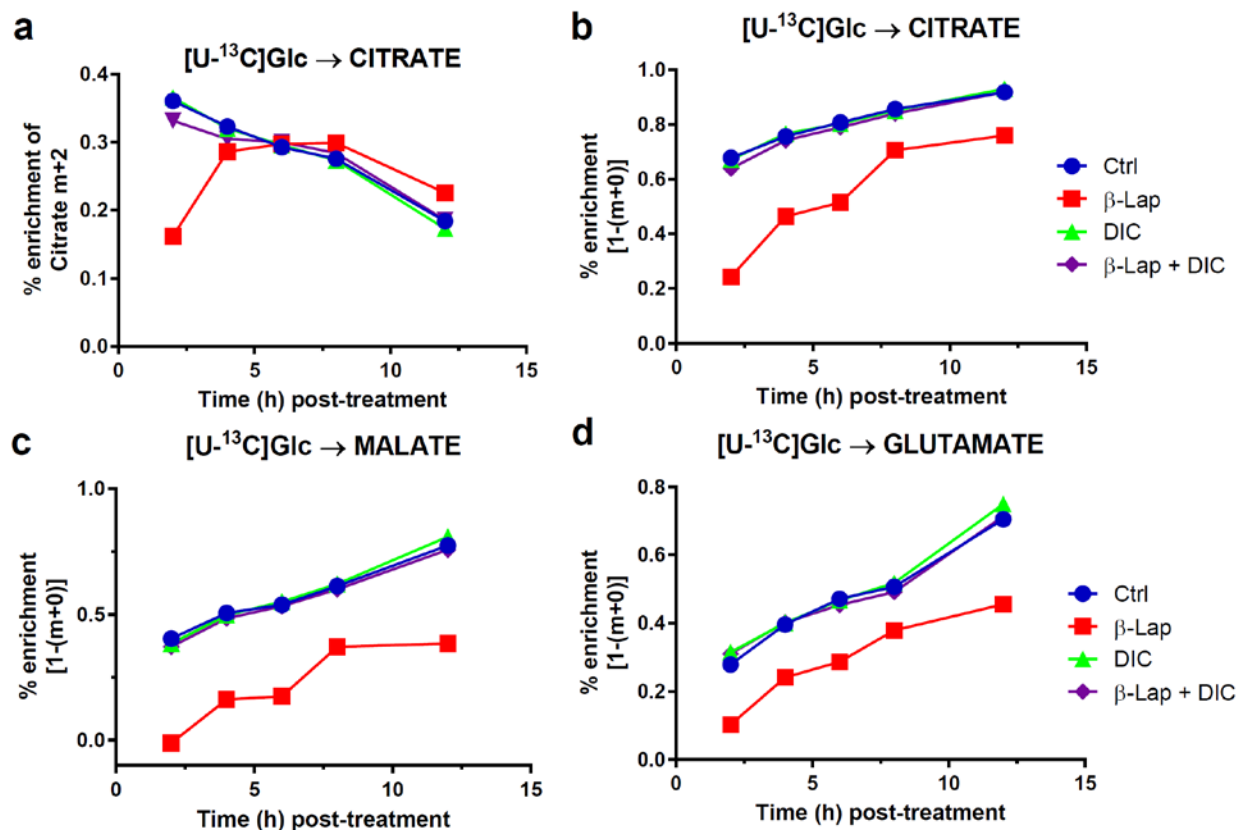

**Figure S2. Time course of labeling of TCA cycle intermediates.** (a-d) Plates were incubated with 10 mM U-<sup>13</sup>C Glucose after a 2 h β-lap (4 μM) treatment, with or without dicoumarol (DIC, 50 μM). (a) Time course over 12 h of citrate m+2 labeling. (b-d) Time course of labeled isotopomers over 12 h is shown for: (b) citrate, (c) malate, and (d) glutamate.

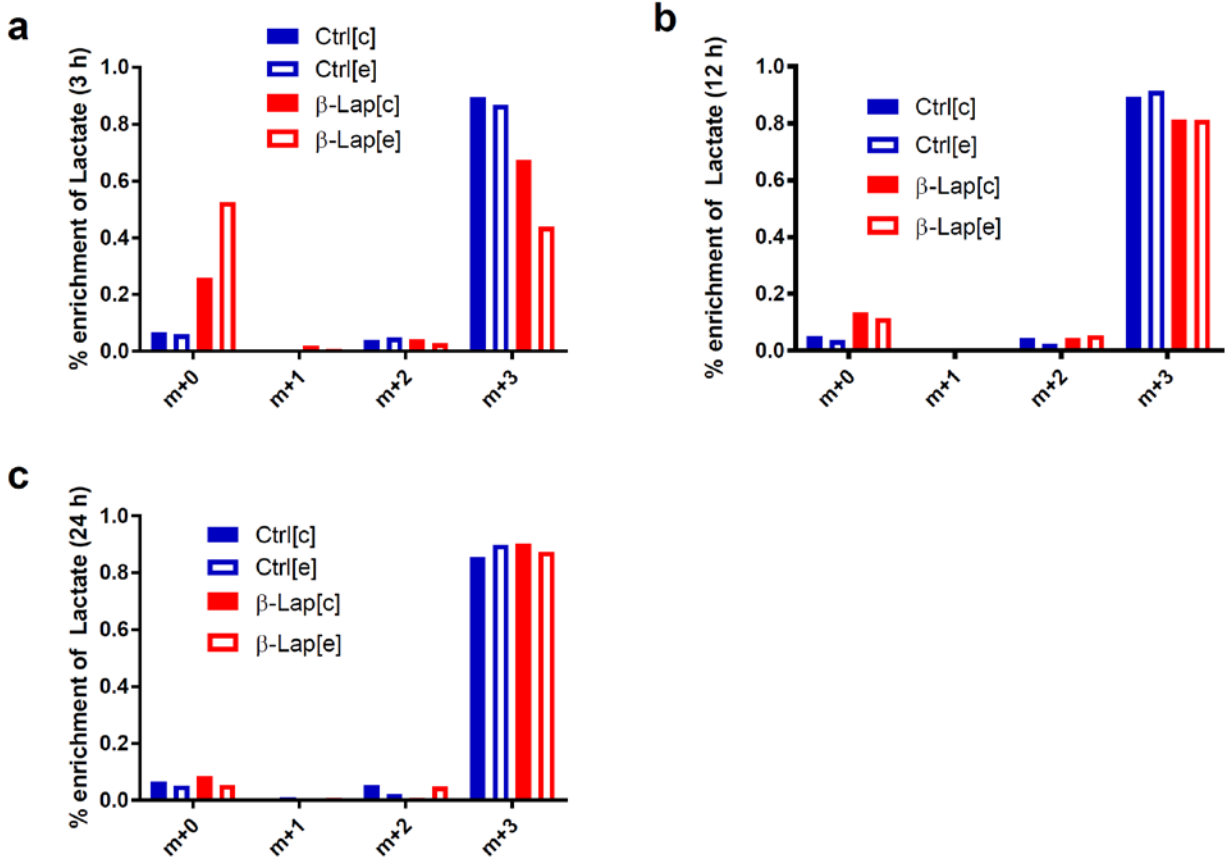

**Figure S3. Lactate enrichment over time after β-lap treatment.** (a-c) GC-MS analysis of lactate isotopomers after labeling with U-<sup>13</sup>C Glucose of both intracellular [c] and extracellular [e] fractions in both control and β-lap (6 μM) cells at 3 h (a), 12 h (b), and 24 h (c).

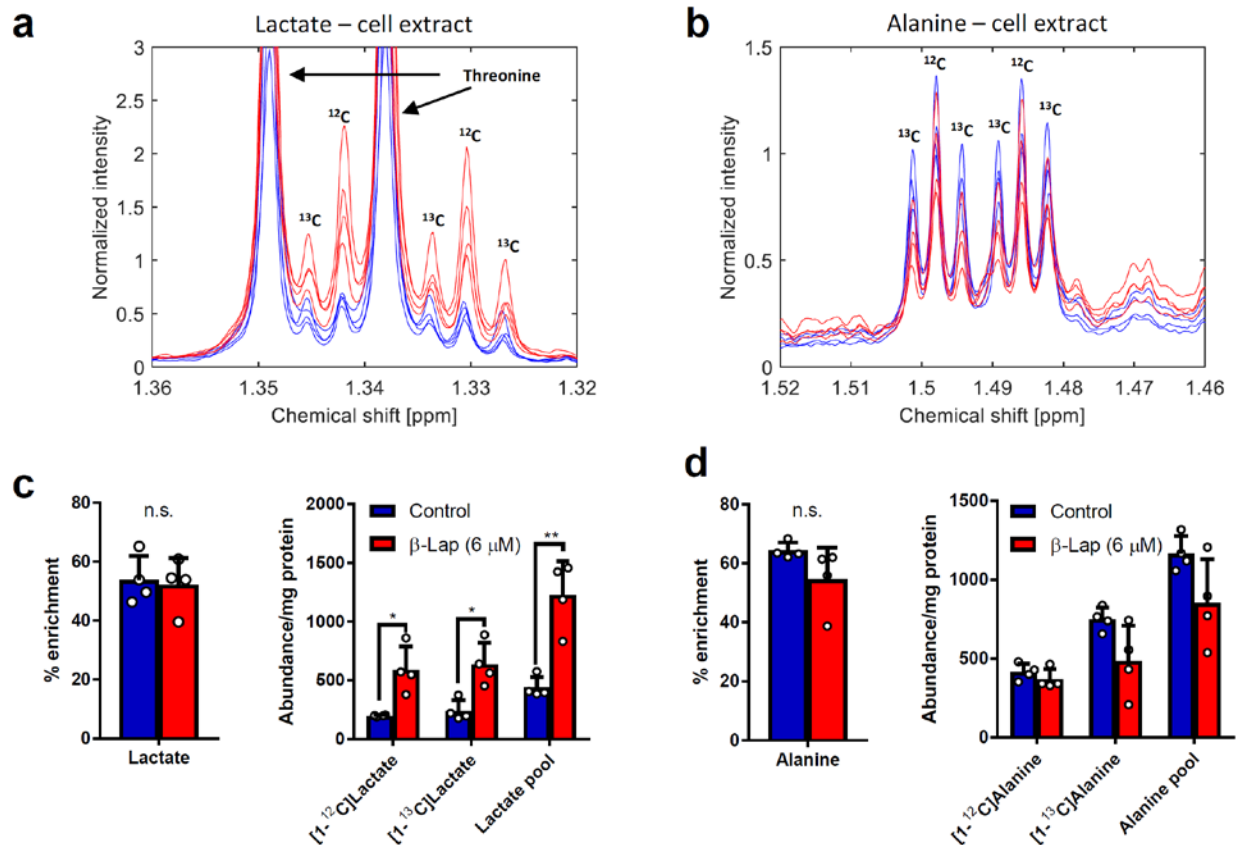

**Figure S4. Lactate and Alanine pool sizes.** (a) Intracellular concentration of enriched (labeled) lactate, unlabeled lactate, and total lactate pool size calculated using <sup>1</sup>H NMR after hyperpolarized [1-<sup>13</sup>C]pyruvate runs. (b) Intracellular concentration of enriched (labeled) alanine, unlabeled alanine, and total alanine pool size calculated using <sup>1</sup>H NMR after hyperpolarized [1-<sup>13</sup>C]pyruvate. (d) Fractional enrichment and intracellular pools of alanine calculated using <sup>1</sup>H NMR after hyperpolarized [1-<sup>13</sup>C]pyruvate experiments. \**p*<0.05, \*\**p*<0.01

Panel (c) is repeated from Figure 4h for the easier comparison.

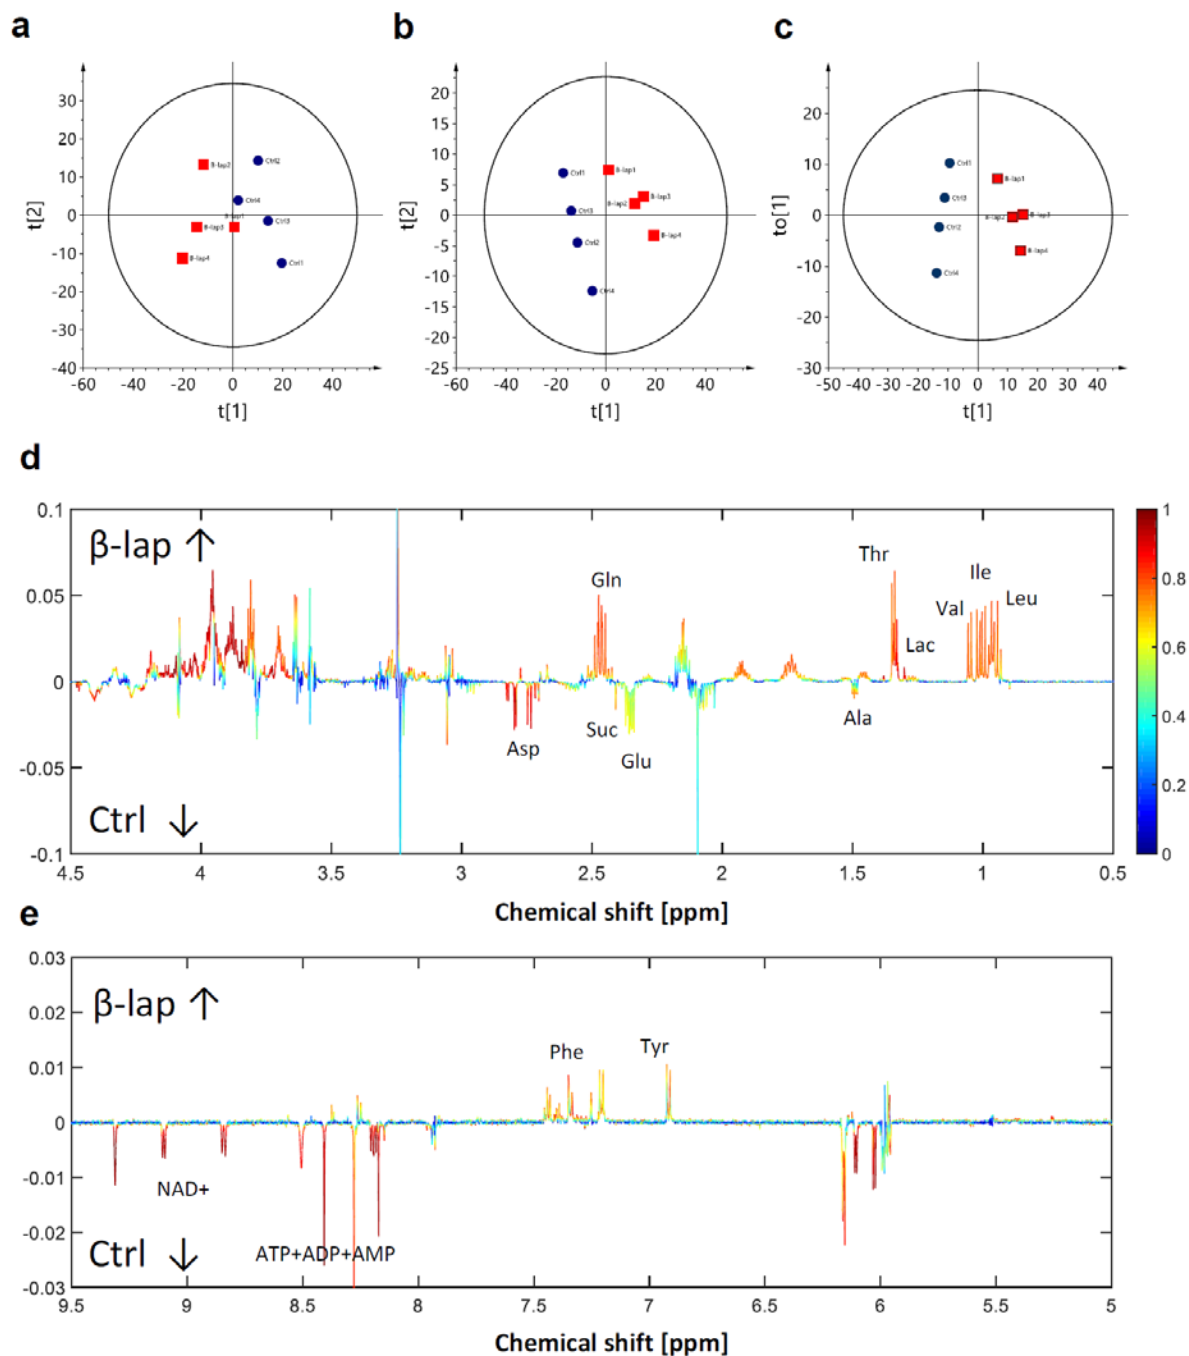

**Figure S5. Multivariate data analysis based on whole metabolic profile.** Separation between  $\beta$ -lap treated cells (6  $\mu$ M) and the control were observed using both unsupervised (a) (PCA) and supervised (b) PLS-DA and (c) OPLS-DA models (n=4). (d) Aliphatic and (e) aromatic spectral region of color-coded loadings of the predictive OPLS-DA component. Signals in the positive y-axis range (Up) were signals found increased in  $\beta$ -lap-treated cells while signals in the negative y-axis range (Down) were metabolites found increased in control (Ctrl) cells. The strength of signals and their overall difference between the two groups is represented by the color bar.

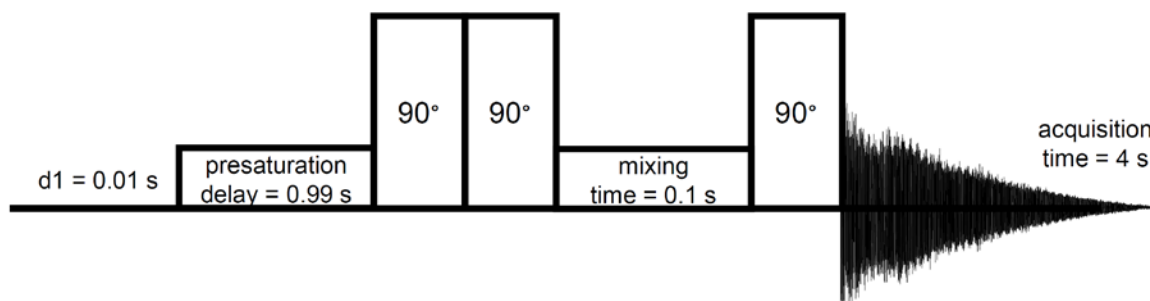

**Figure S6.** METNOESY pulse sequence.
